# Supplementary material for: Teledermatology to Improve Access to and Quality of Skin Care in Eastern Indonesia
Source: PubMed Central journal article supplement (PMC10859791; doi:10.4269/ajtmh.23-0218), 2024-01-02
Supplement: tpmd230218.SD1.pdf [file tpmd230218.SD1.pdf]

## Supplementary Material

**Table S1.** Spectrum of skin diseases reported through teledermatology in Sumba, Indonesia

|    | <b>Diagnosis</b>            | <b>Number of patients<br/>(N, %)</b> |
|----|-----------------------------|--------------------------------------|
| 1  | Impetigo                    | 23 (7.5)                             |
| 2  | Tinea corporis              | 23 (7.5)                             |
| 3  | Multibacillary leprosy      | 22 (7.2)                             |
| 4  | Atopic dermatitis           | 17 (5.5)                             |
| 5  | Lichen simplex chronicus    | 16 (5.2)                             |
| 6  | Chronic eczema              | 15 (4.9)                             |
| 7  | Acute eczema                | 12 (3.9)                             |
| 8  | Herpes zoster               | 11 (3.6)                             |
| 9  | Pediculosis capitis         | 9 (2.9)                              |
| 10 | Scabies                     | 9 (2.9)                              |
| 11 | Hand foot mouth disease     | 7 (2.3)                              |
| 12 | Hand eczema                 | 6 (2.0)                              |
| 13 | Persistent insect bites     | 6 (2.0)                              |
| 14 | Pityriasis versicolor       | 6 (2.0)                              |
| 15 | Allergic contact dermatitis | 5 (1.6)                              |
| 16 | Ecthyma                     | 5 (1.6)                              |
| 17 | Seborrheic dermatitis       | 5 (1.6)                              |
| 18 | Tinea inguinalis            | 5 (1.6)                              |
| 19 | Candidiasis                 | 4 (1.3)                              |
| 20 | Chromoblastomycosis         | 4 (1.3)                              |
| 21 | Dermatitis, non-specific    | 4 (1.3)                              |
| 22 | Folliculitis                | 4 (1.3)                              |
| 23 | Psoriasis                   | 4 (1.3)                              |
| 24 | Psoriasis guttata           | 4 (1.3)                              |
| 25 | Tinea imbricata             | 4 (1.3)                              |
| 26 | Varicella                   | 4 (1.3)                              |
| 27 | Diaper dermatitis           | 3 (1.0)                              |
| 28 | Irritant contact dermatitis | 3 (1.0)                              |
| 29 | Paederus dermatitis         | 3 (1.0)                              |
| 30 | Pitted keratolysis          | 3 (1.0)                              |
| 31 | Cheilitis angularis         | 2 (0.7)                              |
| 32 | Chronic wound               | 2 (0.7)                              |
| 33 | Discoid lupus erythematosus | 2 (0.7)                              |

|    |                                             |         |
|----|---------------------------------------------|---------|
| 34 | Folliculitis capitis                        | 2 (0.7) |
| 35 | Pityriasis alba                             | 2 (0.7) |
| 36 | Urticaria                                   | 2 (0.7) |
| 37 | Verruca vulgaris                            | 2 (0.7) |
| 38 | Yeast infection                             | 2 (0.7) |
| 39 | Abscess                                     | 1 (0.3) |
| 40 | Acneiform eruption induced by steroid abuse | 1 (0.3) |
| 41 | Acral lentiginous melanoma                  | 1 (0.3) |
| 42 | Actinic cheilitis                           | 1 (0.3) |
| 43 | Balanitis                                   | 1 (0.3) |
| 44 | Bullous impetigo                            | 1 (0.3) |
| 45 | Culicosis bullosa                           | 1 (0.3) |
| 46 | Eczematous cheilitis                        | 1 (0.3) |
| 47 | Filariasis                                  | 1 (0.3) |
| 48 | Herpes simplex                              | 1 (0.3) |
| 49 | Hordeolum                                   | 1 (0.3) |
| 50 | Hyperpigmentation                           | 1 (0.3) |
| 51 | Hypertrophic lichen planus                  | 1 (0.3) |
| 52 | Ichthyosis                                  | 1 (0.3) |
| 53 | Intertrigo                                  | 1 (0.3) |
| 54 | Lentigines                                  | 1 (0.3) |
| 55 | LEOPARD syndrome (suspected)                | 1 (0.3) |
| 56 | Lichen nitidus                              | 1 (0.3) |
| 57 | Marasmus                                    | 1 (0.3) |
| 58 | Miliaria                                    | 1 (0.3) |
| 59 | Miliaria pustulosa                          | 1 (0.3) |
| 60 | Miliaria rubra                              | 1 (0.3) |
| 61 | Mollusca contagiosum                        | 1 (0.3) |
| 62 | Nummular eczema                             | 1 (0.3) |
| 63 | Onychomycosis                               | 1 (0.3) |
| 64 | Papular eczema                              | 1 (0.3) |
| 65 | Paucibacillary leprosy                      | 1 (0.3) |
| 66 | Pediculosis corporis                        | 1 (0.3) |
| 67 | Peri-anal eczema                            | 1 (0.3) |
| 68 | Pityriasis rosea                            | 1 (0.3) |
| 69 | Porokeratosis                               | 1 (0.3) |
| 70 | Prurigo                                     | 1 (0.3) |
| 71 | Prurigo nodularis                           | 1 (0.3) |
| 72 | Pyoderma                                    | 1 (0.3) |

|    |                               |         |
|----|-------------------------------|---------|
| 73 | Sebaceous hyperplasia         | 1 (0.3) |
| 74 | Snake bite                    | 1 (0.3) |
| 75 | Tinea capitis                 | 1 (0.3) |
| 76 | Tinea pedis                   | 1 (0.3) |
| 77 | Toxic erythema of the newborn | 1 (0.3) |
| 78 | Verruca planae                | 1 (0.3) |
| 79 | Verruca plantaris             | 1 (0.3) |
| 80 | Vitiligo                      | 1 (0.3) |
| 81 | Wound infection               | 1 (0.3) |
| 82 | Xerosis cutis                 | 1 (0.3) |
| 83 | Yaws-like disease             | 1 (0.3) |

**Table S2.** Satisfaction survey among 25 frontline healthcare workers participating in teledermatology services \*

|                                                                       | <b>1</b>                   | <b>2</b>                  | <b>3</b>                         | <b>4</b>                       | <b>5</b>                           |
|-----------------------------------------------------------------------|----------------------------|---------------------------|----------------------------------|--------------------------------|------------------------------------|
| 1. Usefulness of teledermatology service in supporting daily practice | Not useful<br>-            | A little bit useful<br>-  | Moderately useful<br>-           | Very useful<br>3 (12)          | Extremely useful<br>22 (88)        |
| 2. Comfortable to submit a consultation in the WhatsApp group         | Very uncomfortable<br>-    | Uncomfortable<br>-        | Neutral<br>2 (8)                 | Comfortable<br>12 (48)         | Very comfortable<br>11 (44)        |
| 3. Frequency of submitting a consultation in the WhatsApp group       | Never<br>1 (4)             | Rarely (1x/year)<br>2 (8) | Sometimes (<1x/month)<br>10 (40) | Frequent (≥1x/month)<br>8 (32) | Very frequent (≥1x/week)<br>4 (16) |
| 4. Improved my knowledge on skin diseases **                          | No improvement<br>-        | A little bit<br>-         | Moderately<br>1 (4)              | A lot<br>10 (40)               | Tremendously<br>13 (52)            |
| 5. Satisfied with the advice given by the dermatologists              | Totally not satisfied<br>- | Not satisfied<br>-        | Neutral<br>-                     | Satisfied<br>9 (36)            | Very satisfied<br>16 (64)          |
| 6. Are recommendations adapted to local circumstances and resources?  | Never<br>-                 | Seldom<br>-               | Sometimes<br>6 (24)              | Often<br>8 (32)                | Always<br>11 (44)                  |
| 7. Duration of response time by dermatologists                        | Too slow<br>-              | Slow<br>6 (24)            | Normal<br>14 (56)                | Fast<br>4 (16)                 | Very fast<br>1 (4)                 |
| 8. Recommend teledermatology for other clinics in remote settings     | Very unlikely<br>-         | Unlikely<br>-             | Neutral<br>2 (8)                 | Likely<br>5 (20)               | Very likely<br>18 (72)             |

The survey included eight questions using a 5-point rating scale. \* Data are listed as n (%). \*\* 1 response was missing (participant commented (s)he had recently joined the group).
